# Supplementary material
Source: PubMed Central journal article supplement (PMC10538388)
Supplement: NIHMS1929080-supplement-Supporting_Information.pdf [file NIHMS1929080-supplement-Supporting_Information.pdf]

**Supporting Information for**

# TLR agonists delivered by plant virus and bacteriophage nanoparticles for cancer immunotherapy

*Eunkyeong Jung<sup>1</sup>, Young Hun Chung<sup>2,3</sup>, Nicole F Steinmetz<sup>1,2,3,4,5,6,\*</sup>*

*<sup>1</sup>Department of NanoEngineering, University of California, San Diego, 9500 Gilman Dr., La Jolla, California 92093, United States*

*<sup>2</sup>Department of Bioengineering, University of California San Diego, 9500 Gilman Dr., La Jolla, CA 92093, USA*

*<sup>3</sup>Moore's Cancer Center, University of California San Diego, 9500 Gilman Dr., La Jolla, CA 92093, USA.*

*<sup>4</sup>Center for Nano-ImmunoEngineering, University of California San Diego, 9500 Gilman Dr., La Jolla, CA 92093, USA.*

*<sup>5</sup>Department of Radiology, University of California San Diego, 9500 Gilman Dr., La Jolla, CA 92093, USA.*

*<sup>6</sup>Institute for Materials Discovery and Design, University of California San Diego, 9500 Gilman Dr., La Jolla, CA 92093, USA.*

Email: [nsteinmetz@ucsd.edu](mailto:nsteinmetz@ucsd.edu)

KEYWORDS drug delivery platforms, cowpea mosaic virus, cowpea chlorotic mottle virus, bacteriophage Q $\beta$ , TLR7 agonist, TLR3 agonist, cancer immunotherapy

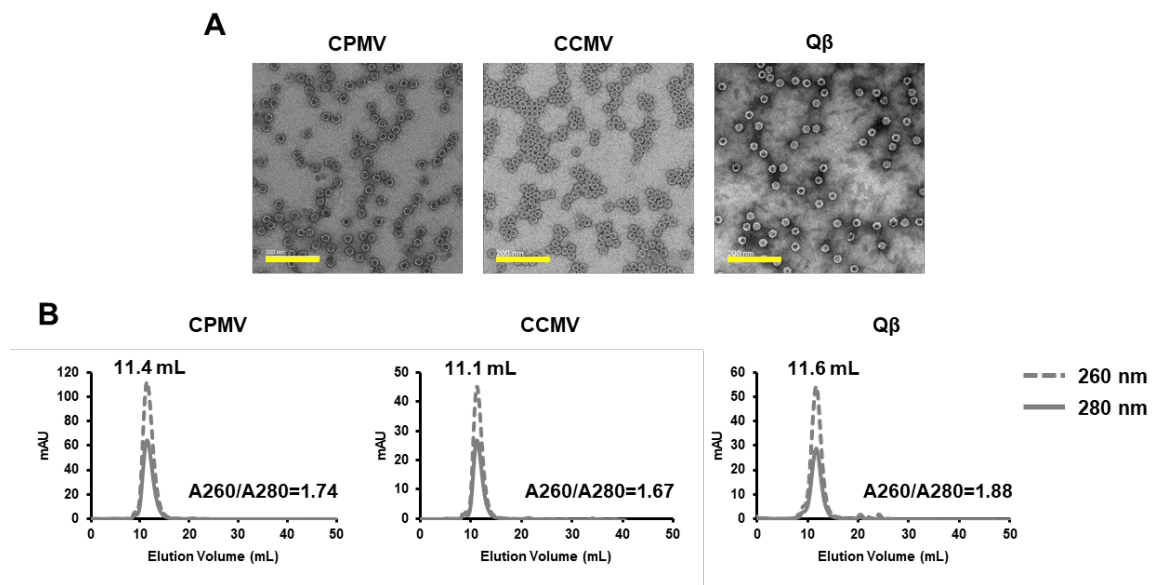

**Figure S1. Characterization of native CPMV, CCMV and Q $\beta$  particles.** (A) Representative TEM image of CPMV, CCMV and Q $\beta$  particles. Scale bar = 200 nm. (B) SEC profiles of CPMV, CCMV and Q $\beta$  particles.

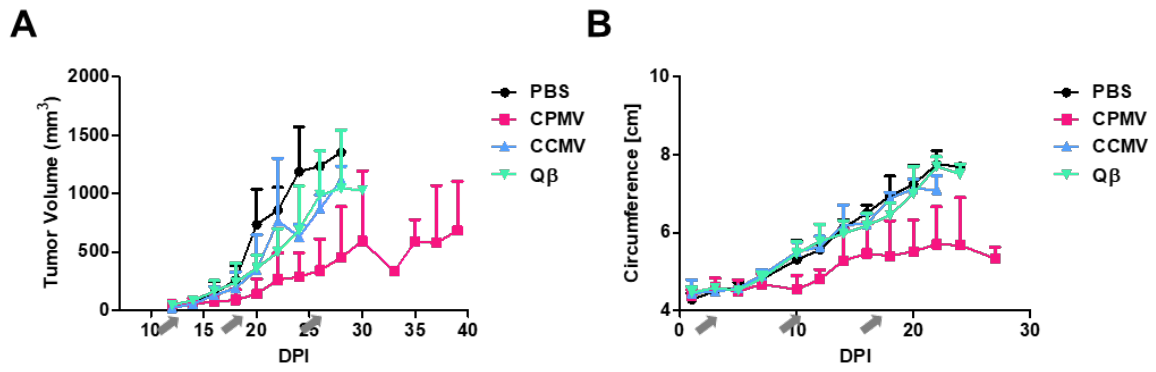

**Figure S2. Comparative *in vivo* therapeutic efficacy of native CPMV, CCMV and Q $\beta$  particles in (A) B16F10 and (B) CT26 murine cancer models. Arrows indicate the treatment days.**

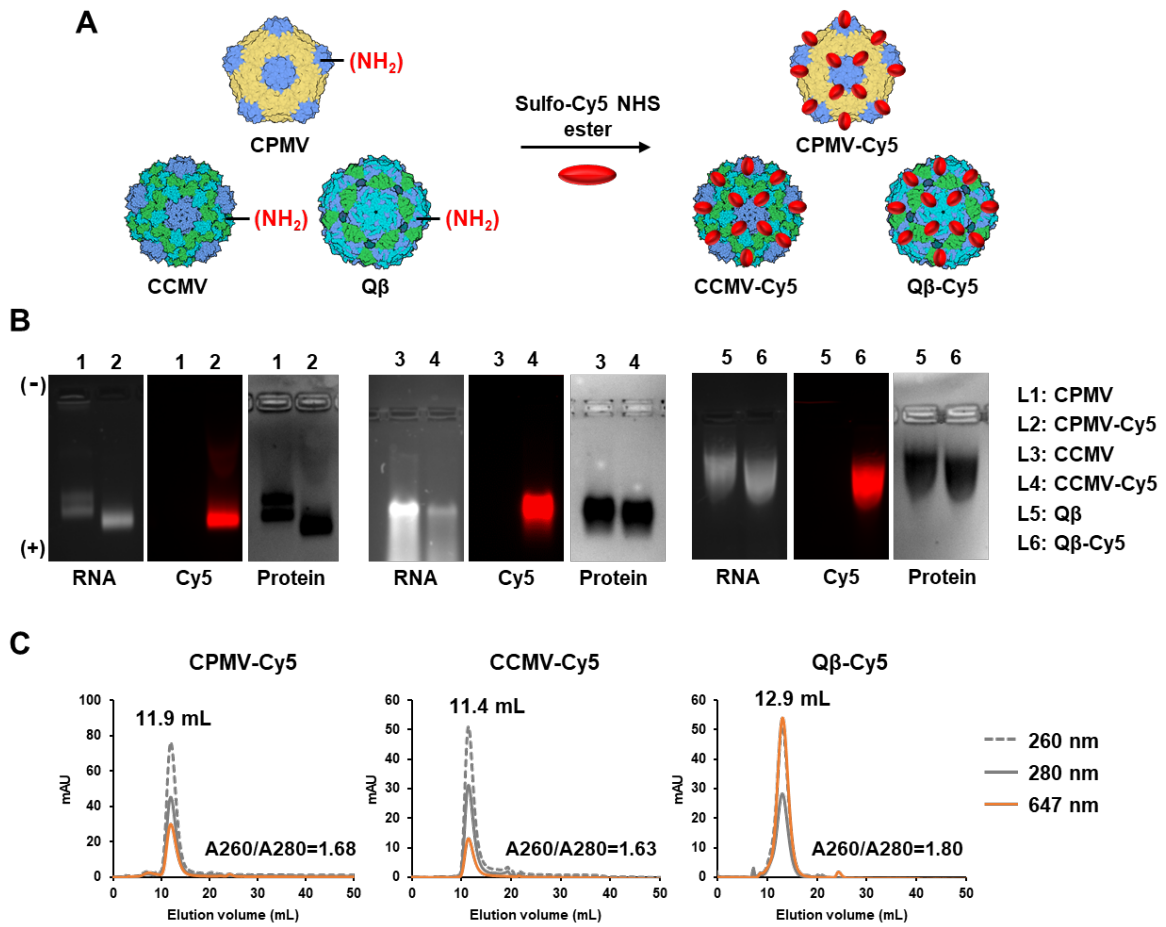

**Figure S3. Characterization of Cy5-labeled CPMV, CCMV and Qβ particles.** (A) Schematic diagram showing the synthesis method. (B) Agarose gel electrophoresis. (C) SEC profiles.

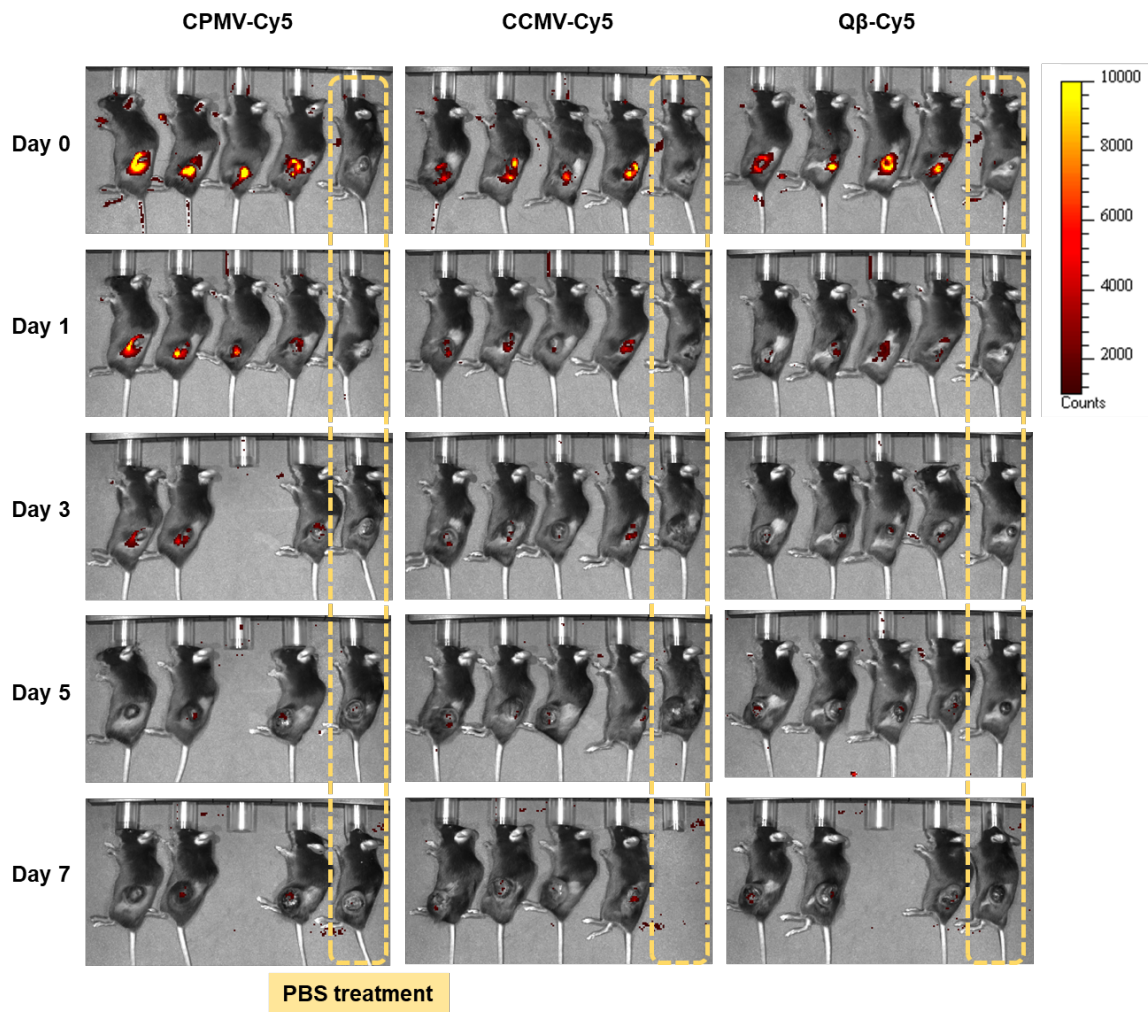

**Figure S4. Biodistribution of Cy5-labeled CPMV, CCMV and Q $\beta$  particles.** We administered Cy5-labeled particles i.d. (100  $\mu$ g/20  $\mu$ L) and monitored fluorescence for 7 days. Yellow dotted lines indicate PBS-treated control mice.

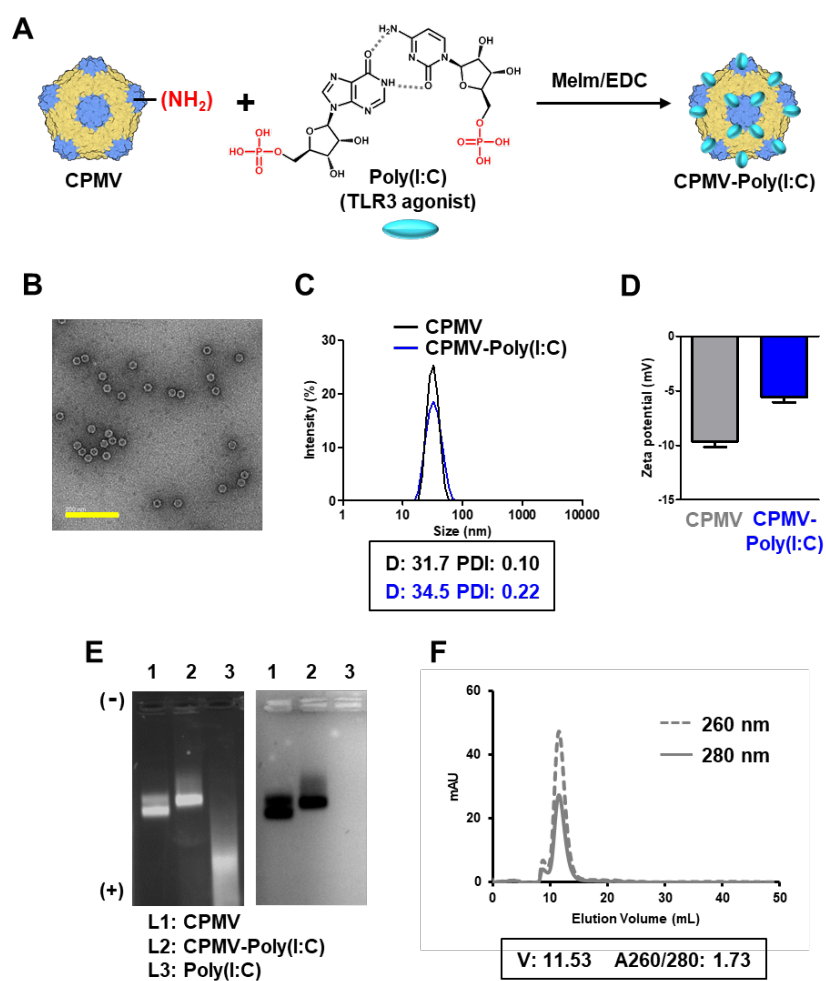

**Figure S5. Characterization of CPMV-poly(I:C) particles.** (A) Schematic diagram showing the synthesis method. MeIm – 1-methylimidazole; EDC – 1-ethyl-3-(3-dimethylaminopropyl)carbodiimide. (B) TEM image of CPMV-poly(I:C) particles. Scale bar = 200 nm. (C) Size distribution and (D) surface charge of CPMV and CPMV-poly(I:C) particles dispersed in 0.1 M KP buffer. The boxed inset shows the average diameter (D, nm) and polydispersity (PDI) of the particles. (E) Agarose gel electrophoresis of CPMV, CPMV-poly(I:C) and poly(I:C). Left panel shows UV light exposure and right panel shows gel stained with Coomassie Brilliant Blue followed by white light exposure. (F) SEC profile of CPMV-poly(I:C). The boxed insets show the elution volume (V, mL) and the absorbance ratio at 260 and 280 nm (A260/280).

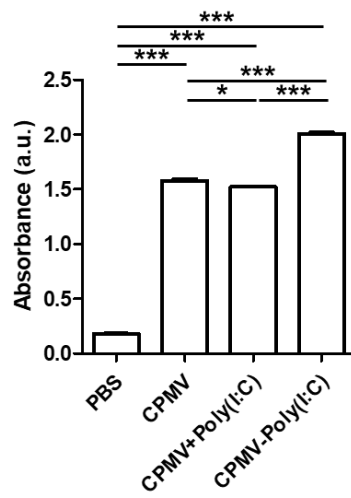

**Figure S6. Evaluation of NF- $\kappa$ B/AP-1 activation in RAW-Blue cells by CPMV-poly(I:C).**  
 Data are means  $\pm$  SEM (n = 6). The results were compared by one-way ANOVA with Tukey's multiple comparisons test (\*\*P < 0.001, \*P < 0.05).
